# Supplementary material
Source: PubMed Central journal article supplement (PMC8255276)
Supplement: NIHMS1673991-supplement-TABLE_S1.pdf [file NIHMS1673991-supplement-TABLE_S1.pdf]

**Table S1.** Clinical characteristics of targeted exome sequencing participants<sup>13\*</sup>

|                                                               | PE women (n=487)     | Controls (n=187)     | P-value <sup>‡</sup> |
|---------------------------------------------------------------|----------------------|----------------------|----------------------|
| Age, years; median (25, 75 percentiles)                       | 29 (26, 32)          | 29 (26, 32)          | 0.993                |
| Body mass index before pregnancy; median (25, 75 percentiles) | 22.6 (20.9, 24.8)    | 22.5 (20.6, 25)      | 0.450                |
| Proteinuria, g/l; median (25, 75 percentiles)                 | 3.31 (1.59, 6.04)    | na                   | na                   |
| Blood pressure: systolic, mmHg; median (25, 75 percentiles)   | 164 (152, 177)       | 125 (118, 133)       | <0.001               |
| Blood pressure: diastolic, mmHg; median (25, 75 percentiles)  | 108 (103, 114)       | 82 (78, 88)          | <0.001               |
| Gestation weeks; median (25, 75 percentiles)                  | 38 (35, 39)          | 40 (39, 41)          | <0.001               |
| Mode of birth (vaginal deliveries n; %)                       | 260; 53.4            | 90; 48.1             | 0.045                |
| Baby sex (% female)                                           | 54                   | 46.5                 | 0.074                |
| Baby weight; g median (25, 75 percentiles)                    | 2820 (2210, 3270)    | 3540 (3260, 3850)    | 0.119                |
| Placenta weight, g; median (25, 75 percentiles)               | 500 (405, 600) n=464 | 590 (500, 670) n=181 | 0.139                |
| Pre-pregnancy smoking %                                       | 21.2, n=467          | 19.7, n=177          | 0.582                |
| First gravidity (n; %)                                        | 328; 67.4            | 144; 77              | 0.030                |
| Primipara (n; %)                                              | 450; 92.4            | 187; 100             | 0.005                |
| Region of origin: Helsinki region (n; %)                      | 251; 51.5            | 100; 53.5            | 0.652                |
| Region of origin: Eastern Finland (n; %)                      | 67; 13.8             | 23; 12.3             | 0.618                |

|                                               |         |          |       |
|-----------------------------------------------|---------|----------|-------|
| Region of origin: Northern Finland (n; %)     | 83; 17  | 29; 15.5 | 0.632 |
| Region of origin: Central Finland (n; %)      | 39; 8   | 22; 11.2 | 0.188 |
| Region of origin: Southwestern Finland (n; %) | 47; 9.7 | 14; 7.4  | 0.381 |

---

\* 97.4% of 500 women with PE and 98.4% of 190 control women passed quality control and their data is reported here and in the association analyses.

‡ Chi2

BMI = mass (kg) / height<sup>2</sup> (m); na, not available (no proteinuria in controls)
